# Supplementary material
Source: PubMed Central journal article supplement (PMC11439267)
Supplement: NIHMS2023210-supplement-Appendix_Tables.pdf [file NIHMS2023210-supplement-Appendix_Tables.pdf]

**Appendix A: Model Fit Indices, and Posterior Probability Percentages**

|         | <b>READING</b> |                |               | <b>MATH</b>    |                |               |
|---------|----------------|----------------|---------------|----------------|----------------|---------------|
|         | BIC            | BIC            | Posterior     | BIC            | BIC            | Posterior     |
|         | N= 1200        | N= 4300        | Probability   | N= 1200        | N= 4300        | Probability   |
|         | Subjects       | Data Points    | Indices       | Subjects       | Data Points    | Indices       |
| 3 Group | -2642.2        | -2651.0        | 81-86%        | <b>-2794.3</b> | <b>-2803.1</b> | <b>79-82%</b> |
| 4 Group | <b>-2626.0</b> | <b>-2638.7</b> | <b>77-83%</b> | -2789.6        | -2800.4        | 68-84%        |
| 5 Group | -2623.4        | -2639.2        | 64-81%        | -2784.4        | -2798.4        | 70-77%        |

SOURCE: U.S. Department of Education, National Center for Education Statistics, Early Childhood Longitudinal Study, Birth Cohort. Selected years 2001-2007

**Appendix B:** Pairwise differences between Mean scores of LPI Trajectories in Reading and Math and Full term Mean scores at All Timepoints

**LPI Reading Trajectories**

|                     |                | <b>High</b> | <b>Middle-High</b> | <b>Reference</b> | <b>At-Risk</b> |
|---------------------|----------------|-------------|--------------------|------------------|----------------|
| <b>9-months</b>     | LPI Mean       | -0.19       | 0.02               | -0.14            | -0.27          |
|                     | Full term Mean | -0.01       | -0.01              | -0.01            | -0.01          |
|                     | p-value        | p < .001    | p = .38            | p < .001         | p < .001       |
| <b>24-months</b>    | LPI Mean       | 0.06        | 0.80               | -0.02            | -0.70          |
|                     | Full term Mean | -0.01       | -0.01              | -0.01            | -0.01          |
|                     | p-value        | p = .21     | p < .001           | p = .63          | p < .001       |
| <b>Preschool</b>    | LPI Mean       | 0.93        | 0.44               | -0.10            | -0.43          |
|                     | Full term Mean | 0.06        | 0.06               | 0.06             | 0.06           |
|                     | p-value        | p < .001    | p < .001           | p < .001         | p < .001       |
| <b>Kindergarten</b> | LPI Mean       | 0.63        | 0.38               | 0.01             | -0.57          |
|                     | Full term Mean | 0.05        | 0.05               | 0.05             | 0.05           |
|                     | p-value        | p < .001    | p < .001           | p = .10          | p < .001       |

**LPI Math Trajectories**

|                     |                | <b>High</b> | <b>Reference</b> | <b>At-Risk</b> |
|---------------------|----------------|-------------|------------------|----------------|
| <b>9-months</b>     | LPI Mean       | -0.08       | -0.17            | -0.24          |
|                     | Full term Mean | -0.01       | -0.01            | -0.01          |
|                     | p-value        | p < .001    | p < .001         | p < .001       |
| <b>24-months</b>    | LPI Mean       | 0.38        | -0.14            | -0.66          |
|                     | Full term Mean | -0.01       | -0.01            | -0.01          |
|                     | p-value        | p < .001    | p < .001         | p < .001       |
| <b>Preschool</b>    | LPI Mean       | 0.51        | -0.10            | -0.61          |
|                     | Full term Mean | 0.06        | 0.06             | 0.06           |
|                     | p-value        | p < .001    | p < .001         | p < .001       |
| <b>Kindergarten</b> | LPI Mean       | 0.51        | -0.04            | -0.78          |
|                     | Full term Mean | 0.05        | 0.05             | 0.05           |
|                     | p-value        | p < .001    | p < .001         | p < .001       |

p-values indicate differences between mean LPI scores for each trajectory, and mean full-term scores at each timepoint, with significant pairwise differences indicated by  $p < .05$ .

SOURCE: U.S. Department of Education, National Center for Education Statistics, Early Childhood Longitudinal Study, Birth Cohort. Selected years 2001-2007
